# Supplementary material for: Zinc-Dependent Histone Deacetylases in Lung Endothelial Pathobiology
Source: Preprints.org preprint supplement (doi:10.20944/preprints202401.0165.v1), 2024-01-03
Supplement: Supplementary file 4 [file supplementary]

Table S1: Molecular and structural characteristics of zinc-dependent HDACs

| Isoform | PDB structure code | **UniProtKB accession** | Location on chromosome | Molecular weight (kDa) |
| --- | --- | --- | --- | --- |
| HDAC1 | **4BKX_2** | Q13547 | 1p35.2-p35.1 | 55.103 |
| HDAC2 | **3MAX_1** | Q92769 | 6q21 | 55.364 |
| HDAC3 | **4A69_1** | O15379 | 5q31.3 | 48.848 |
| HDAC4 | **2VQV_1** | P56524 | 2q37.3 | 119.040 |
| HDAC5 | **AF_AFQ9UQL6F1_1** | Q9UQL6 | 17q21.31 | 121.978 |
| HDAC6 | AF_AFQ9UBN7F1_1 | Q9UBN7 | Xp11.23 | 131.419 |
| HDAC7 | 3C0Y_1 | Q8WUI4 | 12q13.11 | 102.927 |
| HDAC8 | 1T64_1 | Q9BY41 | Xq13.1 | 41.758 |
| HDAC9 | AF-Q9UKV0-F1 | Q9UKV0 | 7p21.1 | 111.297 |
| HDAC10 | AF-Q969S8-F1 | Q969S8 | 22q13.33 | 71.445 |
| HDAC11 | AF-Q96DB2-F1 | Q96DB2 | 3p25.1 | 39.183 |


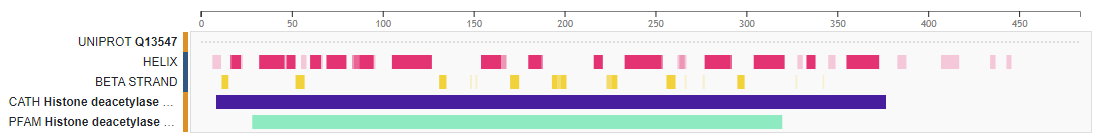

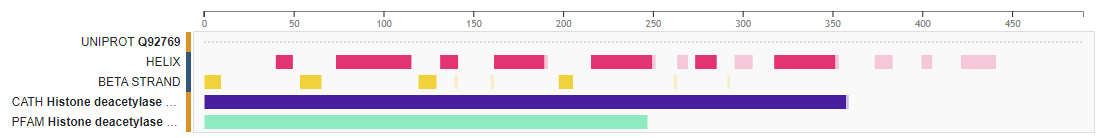

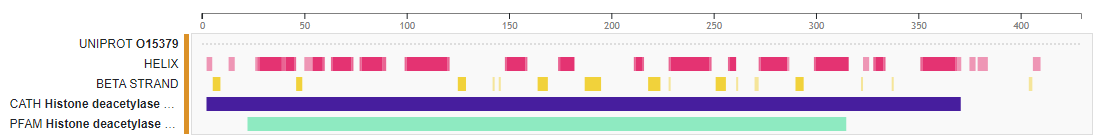

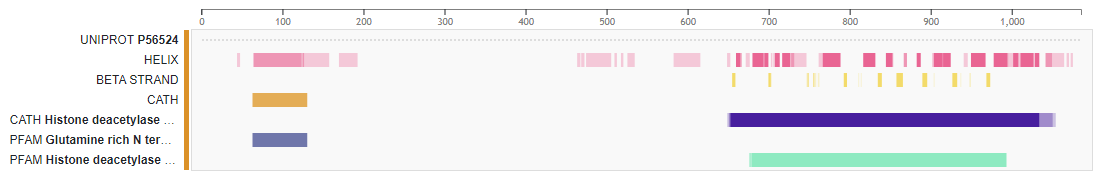

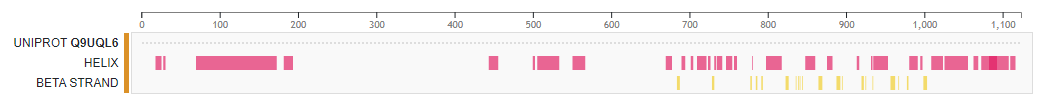

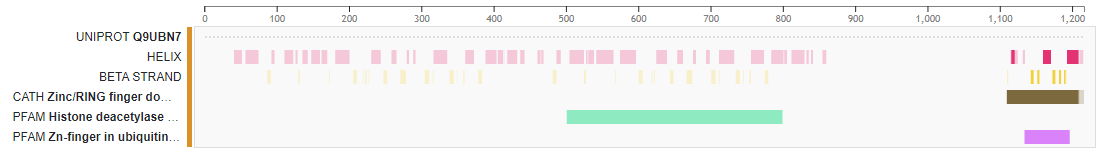

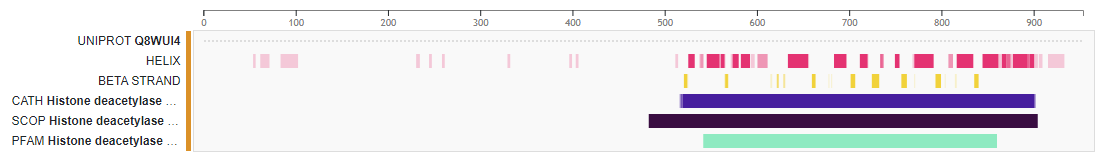

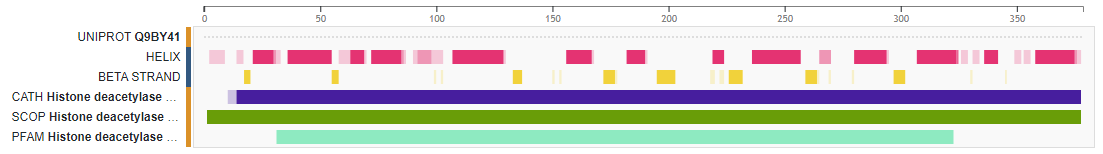

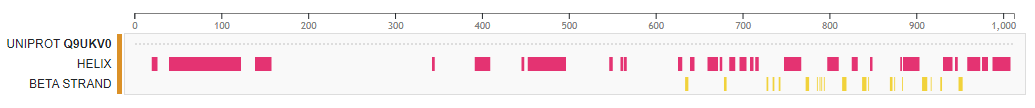

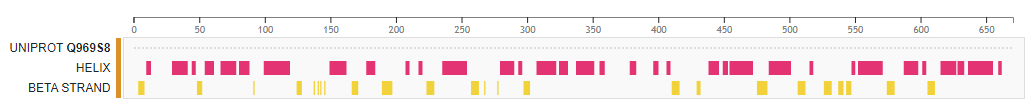

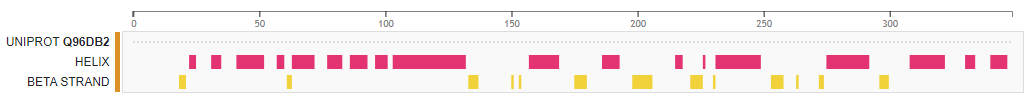

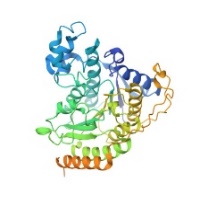

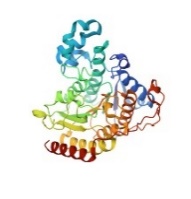

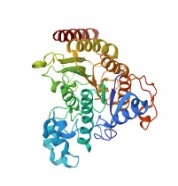

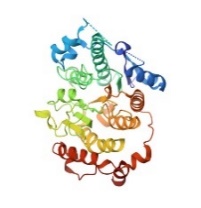

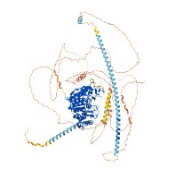

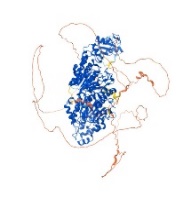

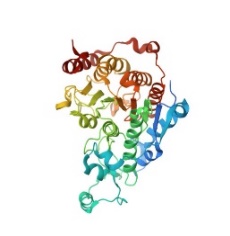

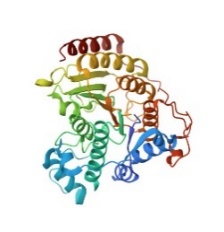

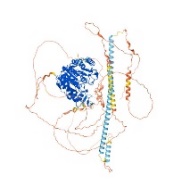

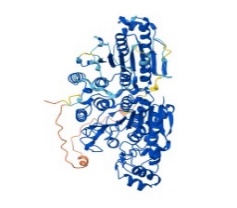

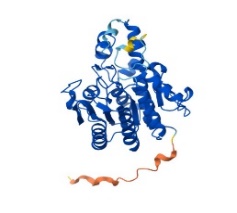


HDAC1

HDAC2

HDAC3

HDAC4

HDAC5

HDAC6

HDAC7

HDAC8

HDAC9

HDAC10

HDAC11

Figure S1: Secondary and tertiary structures of zinc-dependent HDACs derived upon protein data bank and UniProt.
